# Supplementary material for: Enhancing the stability of perovskite solar cells and modules by two-dimensional (PM)2PbI2Cl2
Source: Royal Society of Chemistry journal article supplement (doi:10.1039/d4tc05247a), 2025-01-01
Supplement: d4tc05247a1.pdf [file d4tc05247a1.pdf]

## Supporting Information

### **Enhancing the stability of perovskite solar cells and modules by two-dimensional (PM)<sub>2</sub>PbI<sub>2</sub>Cl<sub>2</sub>**

Yin Gao<sup>a</sup>, Yanyan Gao<sup>b,c</sup>, Maoyuan Wu<sup>b,c</sup>, Shaohang Wu<sup>b,c,\*</sup> Qian Chen<sup>a</sup>, Yang Li<sup>a,\*</sup>,  
Yaohua Mai<sup>b,c</sup>

*a School of Electronics and Information Engineering, Wuyi University, Jiangmen 529020, Guangdong, China*

*b Institute of New Energy Technology, College of Physics & Optoelectronic Engineering, Jinan University, Guangzhou 510632, Guangdong, China*

*c. Guangdong Mellow Energy Co., Ltd, Yuanming Road, Zhuhai 519075, Guangdong, China*

\*Corresponding authors.

*E-mail address:* [wushaohang@jnu.edu.cn](mailto:wushaohang@jnu.edu.cn) (S. Wu), [insidesun51@163.com](mailto:insidesun51@163.com) (Y. Li);

#### **1. Experimental**

*Materials:* Lead(II) iodide (PbI<sub>2</sub>, Purity >99.99%) was purchased from Xi'an Yilante; Formamidinium Iodide (FAI, Purity >99.99%) was purchased from Greatcell Solar Materials; Methylamine hydrochloride (MACl, Purity >99.99%) and (Al<sub>2</sub>O<sub>3</sub>, Particle size <50nm) were purchased from Sigma-Aldrich; Poly[bis(4-phenyl)(2,4,6-trimethylphenyl)amine] (PTAA, Purity >99.5%), 2-Phenylethanamine hydroiodide (PEAI, Purity >99%) and Fullerene-C60 (C60, Purity >99%) were purchased from Xi'an Baolait Company; N,N-Dimethylformamide (DMF, Purity >99.8%), Dimethyl sulfoxide (DMSO, Purity >99.8%), Isopropyl alcohol (IPA, Purity >99.5%) and Chlorobenzene (CB, Purity >99%) were purchased from Maclean; N-Cyclohexyl-2-pyrrolidone (CHP, Purity >99%) and pentamidine hydrochloride (PMCl, Purity >99%) were purchased from Aladdin. All Chemicals were used as received without further purification.

*Solution preparation:* The 3D perovskite solution was prepared by mixing PbI<sub>2</sub> and FAI in a 1:1 ratio in the mixed solvent of DMF, DMSO and CHP (8:1:1, v:v:v), and

10%M MA<sub>2</sub>Cl as the additive. The 2D perovskite solution was prepared by dissolving PM<sub>2</sub>Cl and PbI<sub>2</sub> in a 1:2 ratio in a mixed solvent of DMF and DMSO (4:1). The final 2D/3D precursor solution was obtained by mixing the 2D solution and 3D solution in a volume ratio of 1:4.

*Device Fabrication:* The ITO-coated substrates (2.5×2.5cm<sup>2</sup>) were ultrasonicated twice in water and detergent for 12 min each. The substrates underwent UV-ozone treatment for 10min. PTAA (1.5 mg/mL in chlorobenzene) was spin-coated onto the ITO at 4000 rpm for 30s. The layer was then annealed at 100°C for 10min. The PTAA substrate was spin-coated with 180μL of Al<sub>2</sub>O<sub>3</sub> (in a volume ratio of 1:80 with IPA) and annealed at 100°C for 10min to form the hole transport layer (HTL). Next, 150μL of the perovskite precursor was spin-coated at 4000 rpm with an acceleration rate of 800 rpm/s for 40s, and 300μL of EA was added as an anti-solvent at 30 s. The sample was then annealed at 105°C for 30min. Afterwards, spin coat 100μL of PEAI (0.5mg/ml in IPA) passivation solution at 4000 rpm for 30 seconds, followed by annealing at 105°C for 10min. Next, 30nm of C<sub>60</sub> was evapo-rated, followed by the deposition of 20nm of SnO<sub>2</sub> using atomic layer deposition (Super ALD Corp. E300). Finally, 150nm of Ag electrode was evaporated sequentially to complete the device. Perform other tests after heat treatment at 100°C for 10 minutes.

*Characterization:* The current-voltage (J-V) curves of PSCs were characterized using a solar simulator with a spectrum of 1.5G. The light intensity was calibrated to 1000 W/m<sup>2</sup> using a standard silicon solar cell, and the illumination area was controlled using a black mask with an aperture area of 0.09 cm<sup>2</sup>. The crystal structure of the perovskite film was characterized using a Bruker D8 Advance instrument. The time-resolved photoluminescence (TRPL) lifetime of the perovskite film was measured using a fluorescence spectrometer (FLS980) from Edinburgh Instruments. The external quantum efficiency (EQE) of the PSCs was measured using a spectral response system (Enlitech QE-R). The capacitance-voltage (C-V) curves of the PSCs were measured using an electrochemical workstation(ZAHNER GIMPS, Germany).

## 2. Figures and Tables

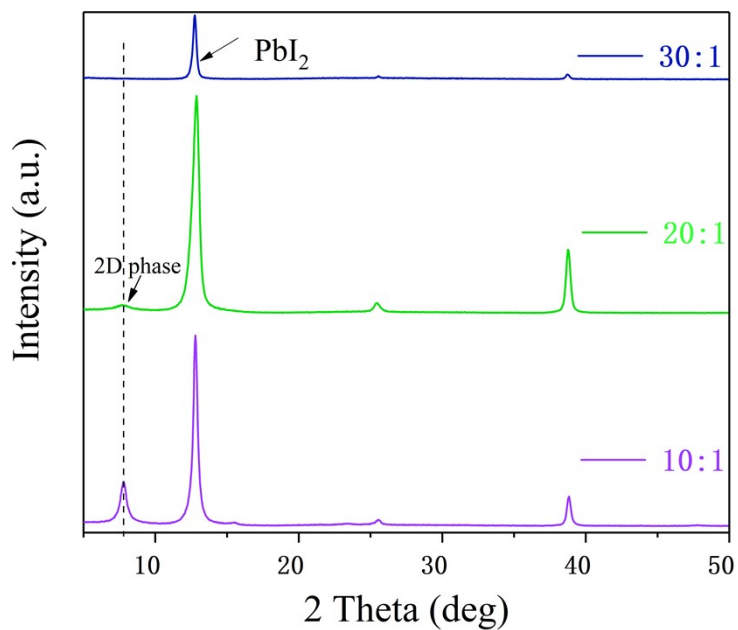

**Fig. S1.** XRD spectra of films prepared with different proportions of PbI<sub>2</sub> and PMCl.

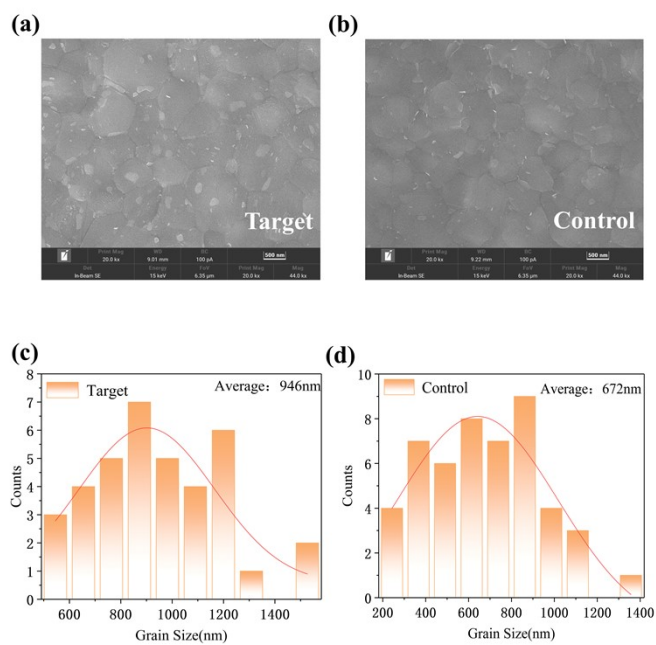

**Fig. S2.** a-d) SEM images and grain size distribution of perovskite films.

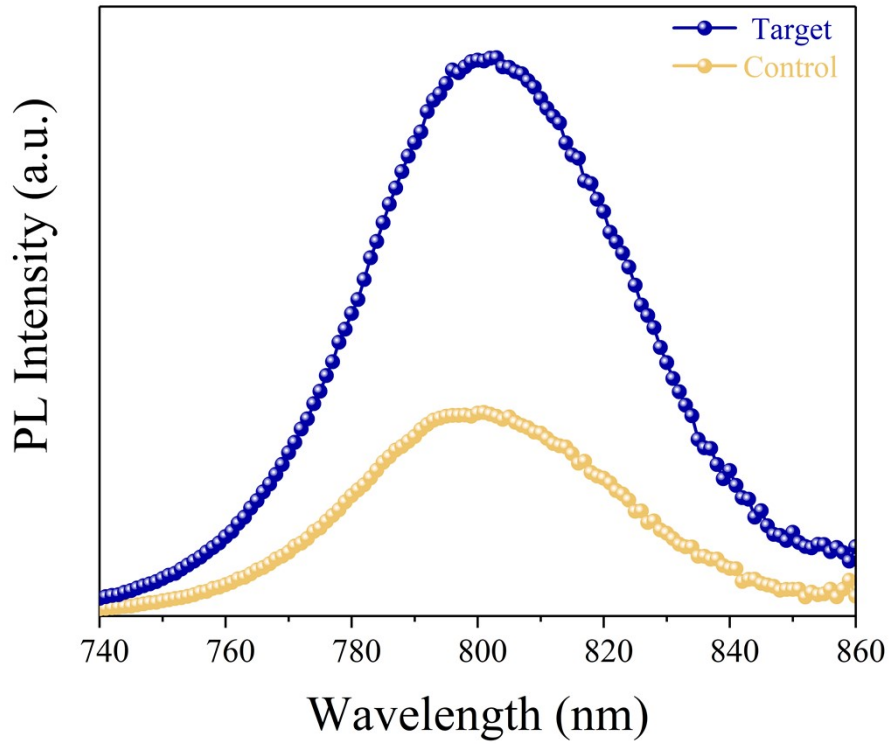

**Fig. S3.** Steady-state PL spectra of films incorporating bare FAPbI<sub>3</sub> (Control) and FAPbI<sub>3</sub> with 2D perovskite (Target).

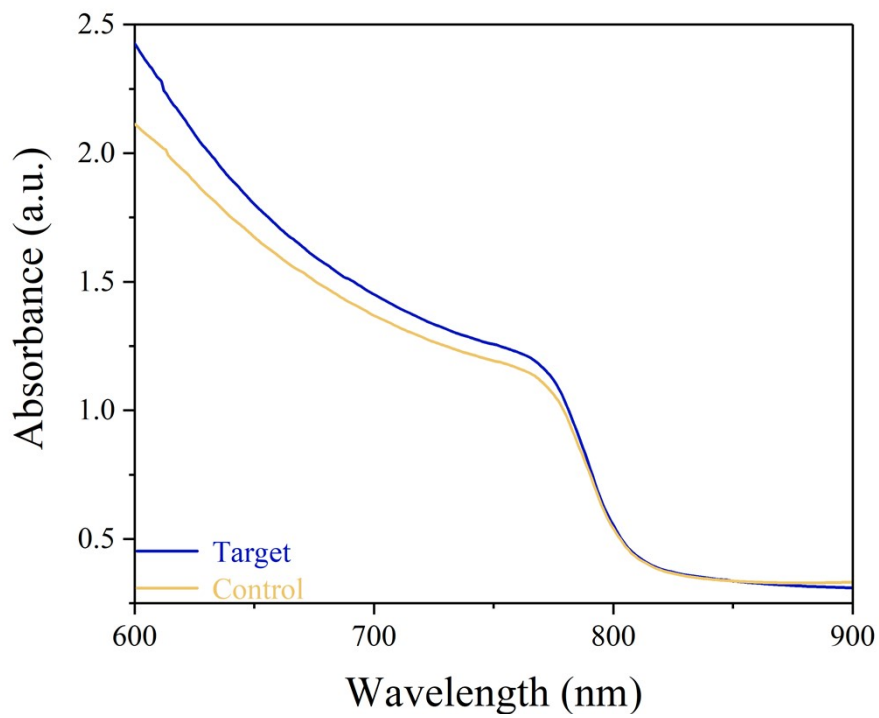

**Fig. S4.** The absorption spectra of PSCs incorporating bare FAPbI<sub>3</sub> (Control) and FAPbI<sub>3</sub> with 2D perovskite (Target).

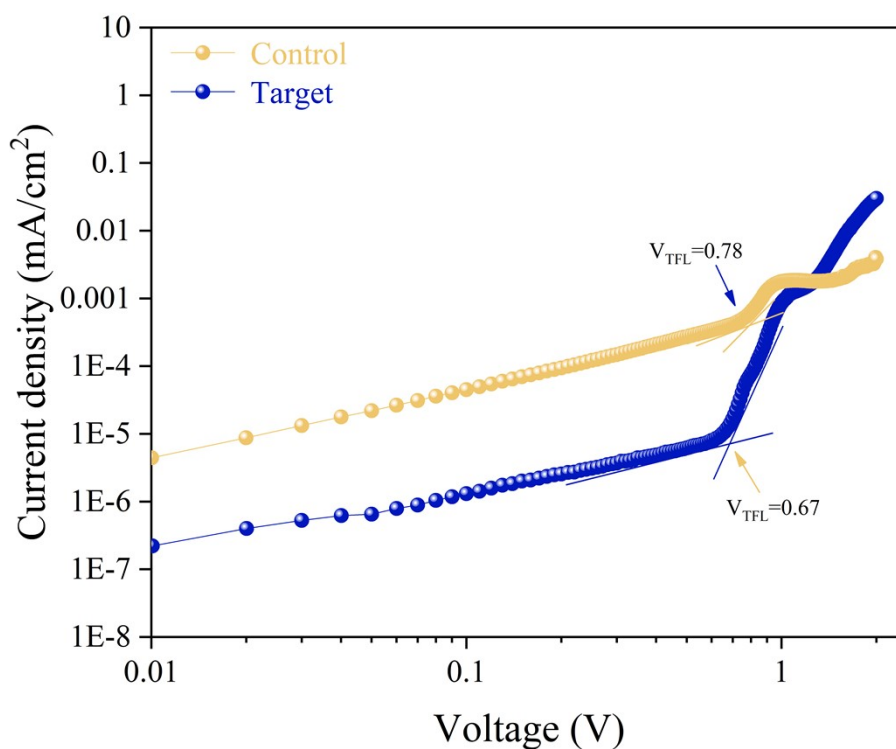

**Fig. S5.** J-V curves of PSCs incorporating bare FAPbI<sub>3</sub> (Control) and FAPbI<sub>3</sub> with 2D perovskite (Target) in the dark.

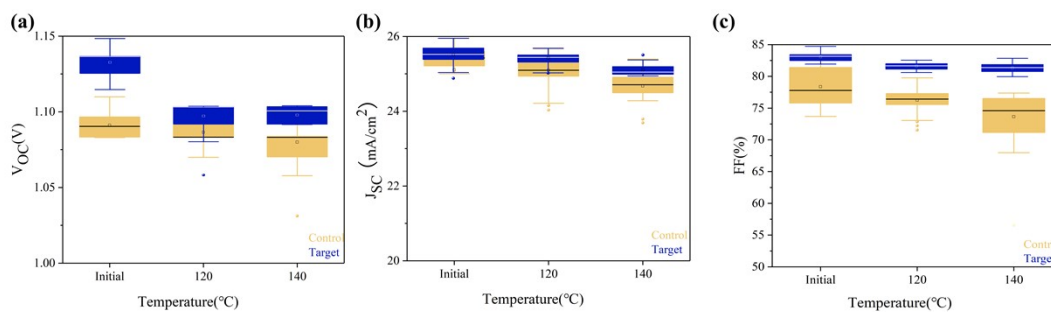

**Fig. S6.** statistics of V<sub>OC</sub> (a), J<sub>SC</sub> (b) and FF (c) of PSCs incorporating bare FAPbI<sub>3</sub> (Control) and FAPbI<sub>3</sub> with 2D perovskite (Target).

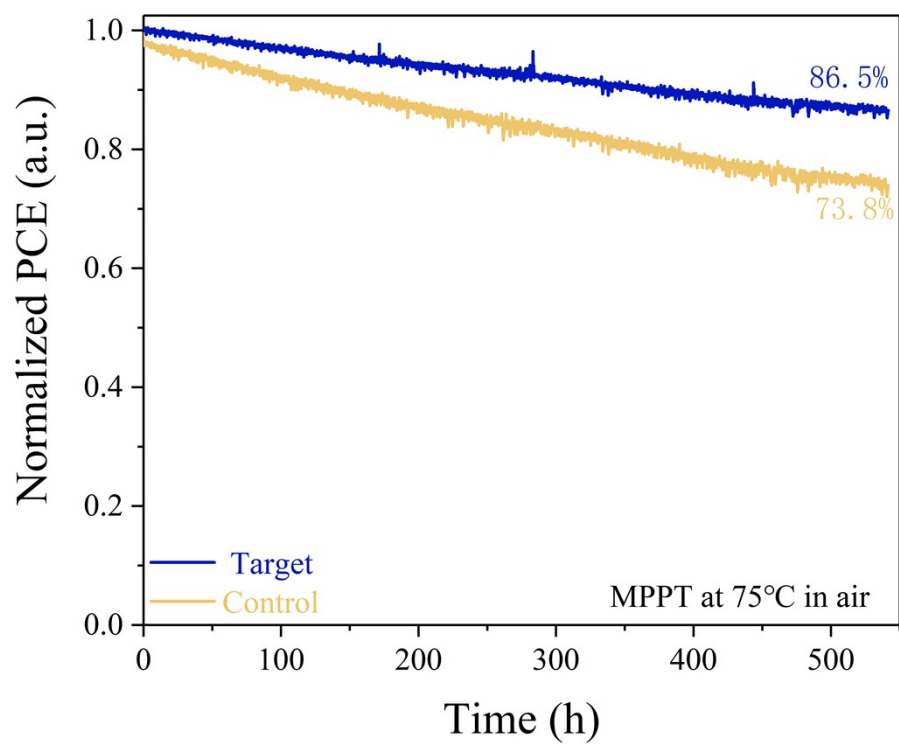

**Fig. S7.** Comparison of the stability of corresponding packaged module under continuous one-sun illumination at 75°C.

**Table S1.** Average efficiency of modules incorporating bare FAPbI<sub>3</sub> and FAPbI<sub>3</sub> with 2D perovskite (16 modules each).

|         | $V_{OC}$ (V) | $J_{SC}$ (mA/cm <sup>2</sup> ) | FF (%) | PCE (%) | $\sigma$ (standard deviations) |
|---------|--------------|--------------------------------|--------|---------|--------------------------------|
| Target  | 7.956        | 3.562                          | 0.782  | 22.457  | 0.183                          |
| Control | 7.914        | 3.540                          | 0.733  | 20.526  | 0.516                          |
